# Supplementary material for: Reconstructing the Population Genetic History of the Caribbean
Source: PubMed Central journal article supplement (PMC3828151; doi:10.1371/journal.pgen.1003925), 2013-11-14
Supplement: pgen.1003925.s018.pdf [file pgen.1003925.s018.pdf]

**Table S2***Correlation p-values of male vs. female ancestry<sup>1</sup>*

| <b>Population</b> | <b>AFR</b> | <b>EUR</b> | <b>NAT</b> |
|-------------------|------------|------------|------------|
| COL               | 0.00022    | 9.00E-05   | 1.00E-05   |
| CUB               | 0.00023    | 0.00046    | < 0.00001  |
| DOM               | 0.03748    | 0.03355    | 0.01294    |
| HAI               | 0.49834    | 0.49923    | 0.49835    |
| HON               | 0.01407    | < 0.00001  | < 0.00001  |
| PUR               | 0.04182    | 0.01473    | 0.01058    |
| ALL               | < 0.00001  | < 0.00001  | < 0.00001  |

<sup>1</sup>Significance was assessed by comparing correlation of ancestry assignments among parent pairs to 100,000 permuted male-female pairs in each population.
