# Supplementary material for: Reconstructing the Population Genetic History of the Caribbean
Source: PubMed Central journal article supplement (PMC3828151; doi:10.1371/journal.pgen.1003925), 2013-11-14
Supplement: pgen.1003925.s019.pdf [file pgen.1003925.s019.pdf]

**Table S3***F<sub>ST</sub> divergences between estimated populations for K=8 using ADMIXTURE*

| K=8        | Eur-North | Yukpa | Warao | Bari  | Eur-South | Eur-Latino | Amerind |
|------------|-----------|-------|-------|-------|-----------|------------|---------|
| Yukpa      | 0.274     |       |       |       |           |            |         |
| Warao      | 0.26      | 0.232 |       |       |           |            |         |
| Bari       | 0.277     | 0.239 | 0.234 |       |           |            |         |
| Eur-South  | 0.02      | 0.284 | 0.269 | 0.286 |           |            |         |
| Eur-Latino | 0.015     | 0.264 | 0.25  | 0.266 | 0.021     |            |         |
| Amerind    | 0.165     | 0.133 | 0.118 | 0.136 | 0.174     | 0.158      |         |
| Yoruba     | 0.184     | 0.372 | 0.358 | 0.375 | 0.176     | 0.164      | 0.27    |
