# Supplementary material for: Reconstructing the Population Genetic History of the Caribbean
Source: PubMed Central journal article supplement (PMC3828151; doi:10.1371/journal.pgen.1003925), 2013-11-14
Supplement: pgen.1003925.s020.pdf [file pgen.1003925.s020.pdf]

**Table S4**

*F<sub>ST</sub> divergences between estimated populations for K=20 using ADMIXTURE*

| K=20                | Eur-North | Surui | Chipewyan | Pima  | Yukpa | Mixe  | Inuit | Patagonia | Eur-Latino insular | Eur-South | Karitiana | Yoruba | Bari  | Eur-Latino mainland | Cabecar | Andean | Tepehuan | Ticuna | Algonquin |
|---------------------|-----------|-------|-----------|-------|-------|-------|-------|-----------|--------------------|-----------|-----------|--------|-------|---------------------|---------|--------|----------|--------|-----------|
| Surui               | 0.296     |       |           |       |       |       |       |           |                    |           |           |        |       |                     |         |        |          |        |           |
| Chipewyan           | 0.159     | 0.237 |           |       |       |       |       |           |                    |           |           |        |       |                     |         |        |          |        |           |
| Pima                | 0.227     | 0.214 | 0.162     |       |       |       |       |           |                    |           |           |        |       |                     |         |        |          |        |           |
| Yukpa               | 0.29      | 0.259 | 0.229     | 0.206 |       |       |       |           |                    |           |           |        |       |                     |         |        |          |        |           |
| Mixe                | 0.19      | 0.157 | 0.121     | 0.089 | 0.151 |       |       |           |                    |           |           |        |       |                     |         |        |          |        |           |
| Inuit               | 0.191     | 0.259 | 0.153     | 0.185 | 0.256 | 0.144 |       |           |                    |           |           |        |       |                     |         |        |          |        |           |
| Patagonia           | 0.175     | 0.178 | 0.133     | 0.121 | 0.17  | 0.071 | 0.157 |           |                    |           |           |        |       |                     |         |        |          |        |           |
| Eur-Latino insular  | 0.037     | 0.291 | 0.165     | 0.225 | 0.287 | 0.188 | 0.193 | 0.176     |                    |           |           |        |       |                     |         |        |          |        |           |
| Eur-South           | 0.039     | 0.312 | 0.175     | 0.24  | 0.305 | 0.205 | 0.202 | 0.189     | 0.041              |           |           |        |       |                     |         |        |          |        |           |
| Karitiana           | 0.272     | 0.216 | 0.213     | 0.185 | 0.232 | 0.132 | 0.234 | 0.153     | 0.269              | 0.287     |           |        |       |                     |         |        |          |        |           |
| Yoruba              | 0.185     | 0.384 | 0.26      | 0.313 | 0.376 | 0.277 | 0.278 | 0.267     | 0.157              | 0.177     | 0.362     |        |       |                     |         |        |          |        |           |
| Bari                | 0.291     | 0.259 | 0.229     | 0.204 | 0.239 | 0.15  | 0.251 | 0.169     | 0.288              | 0.304     | 0.231     | 0.377  |       |                     |         |        |          |        |           |
| Eur-Latino mainland | 0.035     | 0.289 | 0.161     | 0.221 | 0.279 | 0.184 | 0.19  | 0.171     | 0.045              | 0.04      | 0.264     | 0.174  | 0.278 |                     |         |        |          |        |           |
| Cabecar             | 0.259     | 0.224 | 0.194     | 0.166 | 0.195 | 0.112 | 0.218 | 0.134     | 0.256              | 0.271     | 0.197     | 0.344  | 0.177 | 0.244               |         |        |          |        |           |
| Andean              | 0.196     | 0.154 | 0.13      | 0.102 | 0.151 | 0.047 | 0.152 | 0.068     | 0.194              | 0.21      | 0.131     | 0.283  | 0.151 | 0.188               | 0.115   |        |          |        |           |
| Tepehuan            | 0.192     | 0.171 | 0.13      | 0.094 | 0.166 | 0.054 | 0.154 | 0.086     | 0.191              | 0.206     | 0.146     | 0.279  | 0.165 | 0.186               | 0.128   | 0.066  |          |        |           |
| Ticuna              | 0.206     | 0.157 | 0.136     | 0.104 | 0.149 | 0.055 | 0.156 | 0.075     | 0.201              | 0.22      | 0.131     | 0.289  | 0.142 | 0.195               | 0.119   | 0.051  | 0.067    |        |           |
| Algonquin           | 0.188     | 0.281 | 0.168     | 0.206 | 0.275 | 0.164 | 0.21  | 0.177     | 0.195              | 0.201     | 0.253     | 0.294  | 0.271 | 0.19                | 0.237   | 0.171  | 0.173    | 0.177  |           |
| Warao               | 0.278     | 0.241 | 0.214     | 0.193 | 0.236 | 0.135 | 0.238 | 0.156     | 0.276              | 0.295     | 0.215     | 0.363  | 0.234 | 0.27                | 0.202   | 0.136  | 0.151    | 0.134  | 0.258     |
